# Supplementary material
Source: publisher figshare collection journal article supplement (https://gsajournals.figshare.com/articles/dataset/_/21861504)

**Figure S2.** Allele-specific PCR amplification and gel-electrophoresis of exon 6 from *Fktn* with 3 primers (Table S1), indicated by arrows in the schematic below, confirming that the low-coverage p.S245T variant was a sequencing artefact.

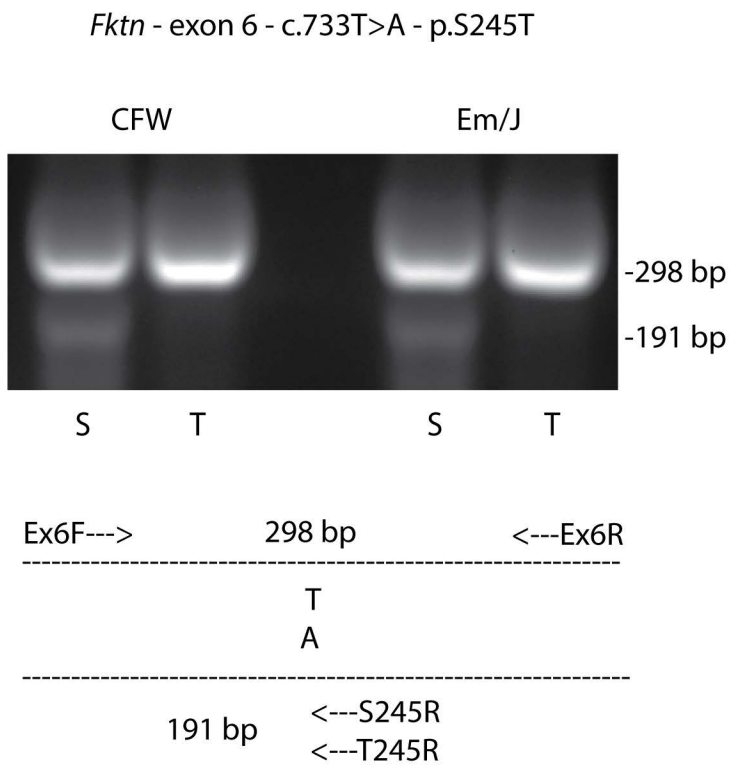

Supplement: Supplementary file 1 [file 1]
