# Supplementary material
Source: publisher figshare collection journal article supplement (https://gsajournals.figshare.com/articles/dataset/_/21861504)

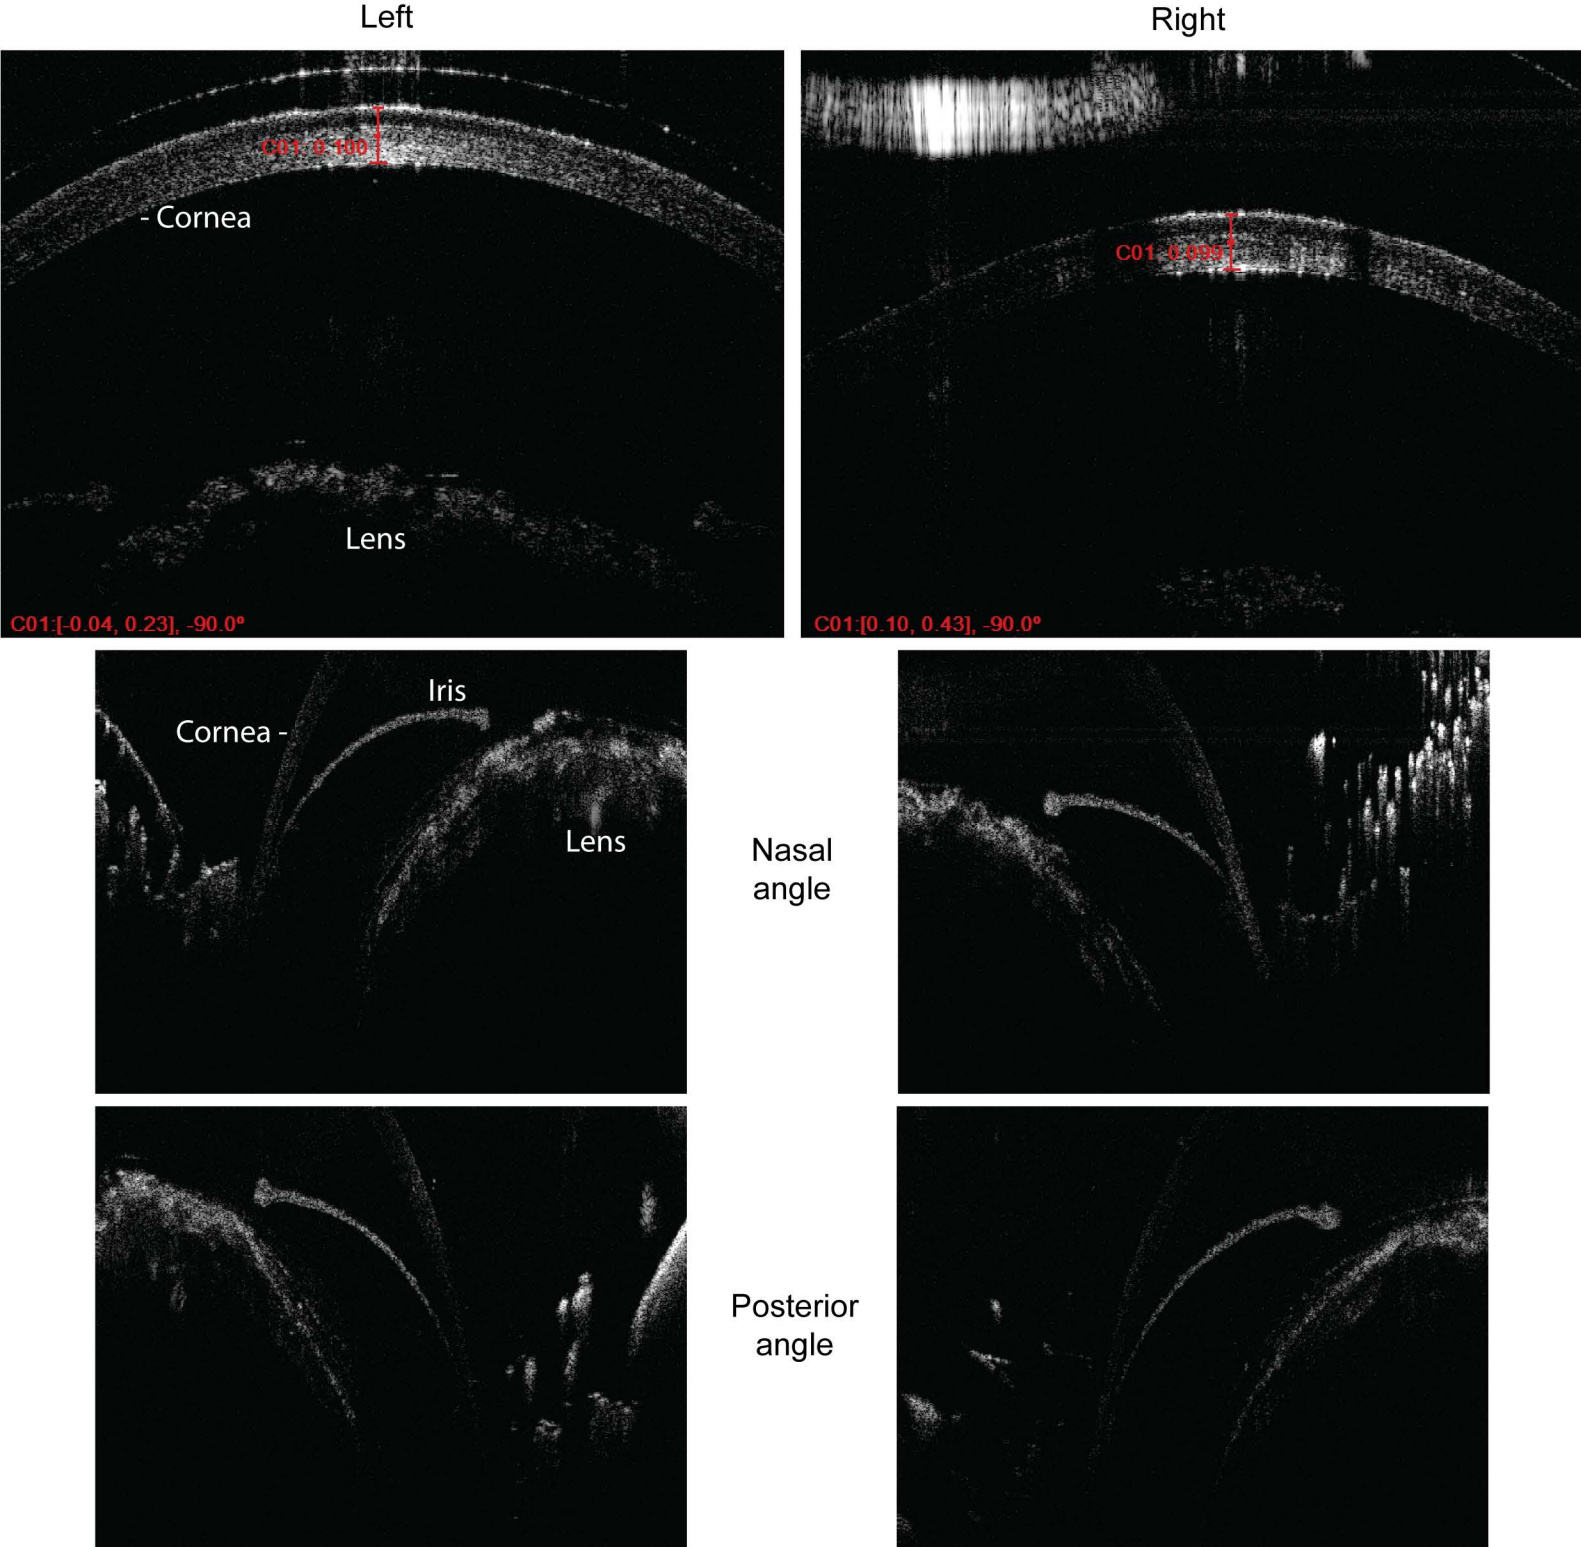

Figure S1. Representative SD-OCT scans of the anterior *Em/J* mouse eye at 7 months of age

Supplement: Supplementary file 2 [file 1]
